# Supplementary material
Source: publisher figshare collection journal article supplement (https://frontiersin.figshare.com/ndownloader/files/22724459)
Supplement: Supplementary file [file 22724459]

Table 1: The list of ion channels used in the model and their parameters.

| Channel type | Conductivity (S/cm <sup>2</sup> ) | The midpoint of activation (mV) |                 | tau <sub>fast</sub> (mS) |     | Reference                |
|--------------|-----------------------------------|---------------------------------|-----------------|--------------------------|-----|--------------------------|
| Nav1.3       | 0.2                               | experiment                      | $-25.5 \pm 1.6$ | experiment               | 2   | (Cummins et al., 2001)   |
|              |                                   | model                           | -26             | model                    | 2.3 |                          |
| Nav1.7       | 0.1                               | experiment                      | $-20.3 \pm 0.8$ | experiment               | 0.6 | (Tigerholm et al., 2013) |
|              |                                   | model                           | -20             | model                    | 0.5 |                          |
| Nav1.8       | 0.2                               | experiment                      | $-1.11 \pm 1.6$ | experiment               | 5   | (Balbi et al., 2017)     |
|              |                                   | model                           | -1.1            | model                    | 3.9 |                          |
| K-A          | 0.1                               | experiment                      | $-1.4 \pm 1.4$  | experiment               | —   | (Gasparini et al., 2004) |
|              |                                   | model                           | -1              | model                    | —   |                          |
| K-DR         | 0.01                              | experiment                      | $13.4 \pm 1.8$  | experiment               | —   | (Tigerholm et al., 2013) |
|              |                                   | model                           | 13              | model                    | —   |                          |

Table 2: The list of ATP-gated P2X2 and P2X3 and 5-HT-gated 5-HT3 receptors and their parameters

| Receptor type | $E_v$ (mV )      | Desensitization rate(s) | Recovery time (min) | EC50 ( $\mu$ M) | Reference                |
|---------------|------------------|-------------------------|---------------------|-----------------|--------------------------|
| P2X2          | $-6.37 \pm 1.09$ | extremely slow          | —                   | 9.8             | (Moffatt and Hume, 2007) |
| P2X3          | $1 \pm 2$        | $24.5 \pm 1$            | 2 — 8               | 1.5             | (Sokolova et al., 2006)  |
| 5-HT3         | 28               | $0.46 \pm 0.15$         | 0.25 — 0.5          | $2.7 \pm 0.5$   | (Corradi et al., 2009)   |

Table 3: The list of models with their significant parameters where the difference between previous and next model is emphasized.

| Model | Degradation coefficient | Conductance of Nav1.7/Nav1.8 channels (S/cm <sup>2</sup> ) | Number of ATP release events | Topology         | Receptors        |
|-------|-------------------------|------------------------------------------------------------|------------------------------|------------------|------------------|
| 1     | 0                       | 0.1 / 0.0                                                  | 1                            | line             | p2x3             |
| 2     | <b>0.001</b>            | 0.1 / 0.0                                                  | 1                            | line             | p2x3             |
| 3     | <b>0.1</b>              | 0.1 / 0.0                                                  | 1                            | line             | p2x3             |
| 4     | 0                       | 0.1 / 0.0                                                  | 1                            | line             | <b>p2x2</b>      |
| 5     | 1                       | 0.1 / 0.0                                                  | 1                            | line             | <b>p2x2/p2x3</b> |
| 6     | 1                       | <b>0.2 / 0.0</b>                                           | 1                            | line             | p2x3             |
| 7     | 1                       | <b>0.1 / 0.1</b>                                           | 1                            | line             | p2x3             |
| 8     | 1                       | <b>0.1 / 0.2</b>                                           | 1                            | line             | p2x3             |
| 9     | 1                       | 0.1 / 0.0                                                  | <b>2</b>                     | line             | p2x3             |
| 10    | 1                       | 0.1 / 0.2                                                  | 1                            | <b>branching</b> | p2x3             |
| 11    | 1                       | 0.1 / 0.2                                                  | <b>2</b>                     | branching        | p2x3             |

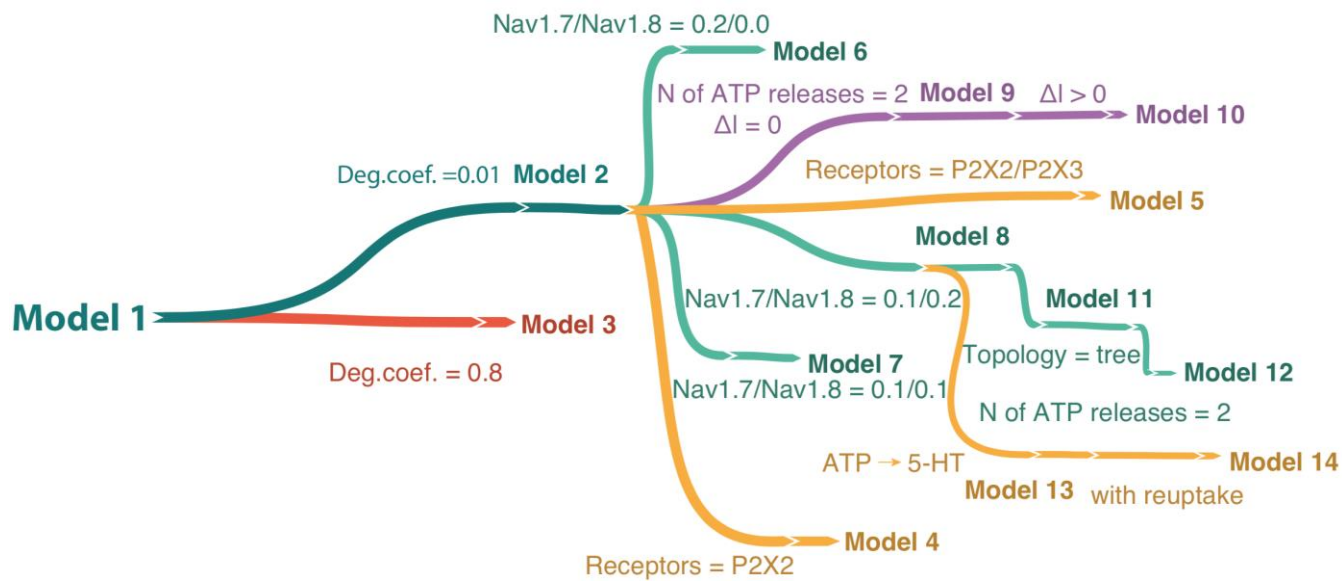

Supplementary Figure 1. The hierarchy of models.

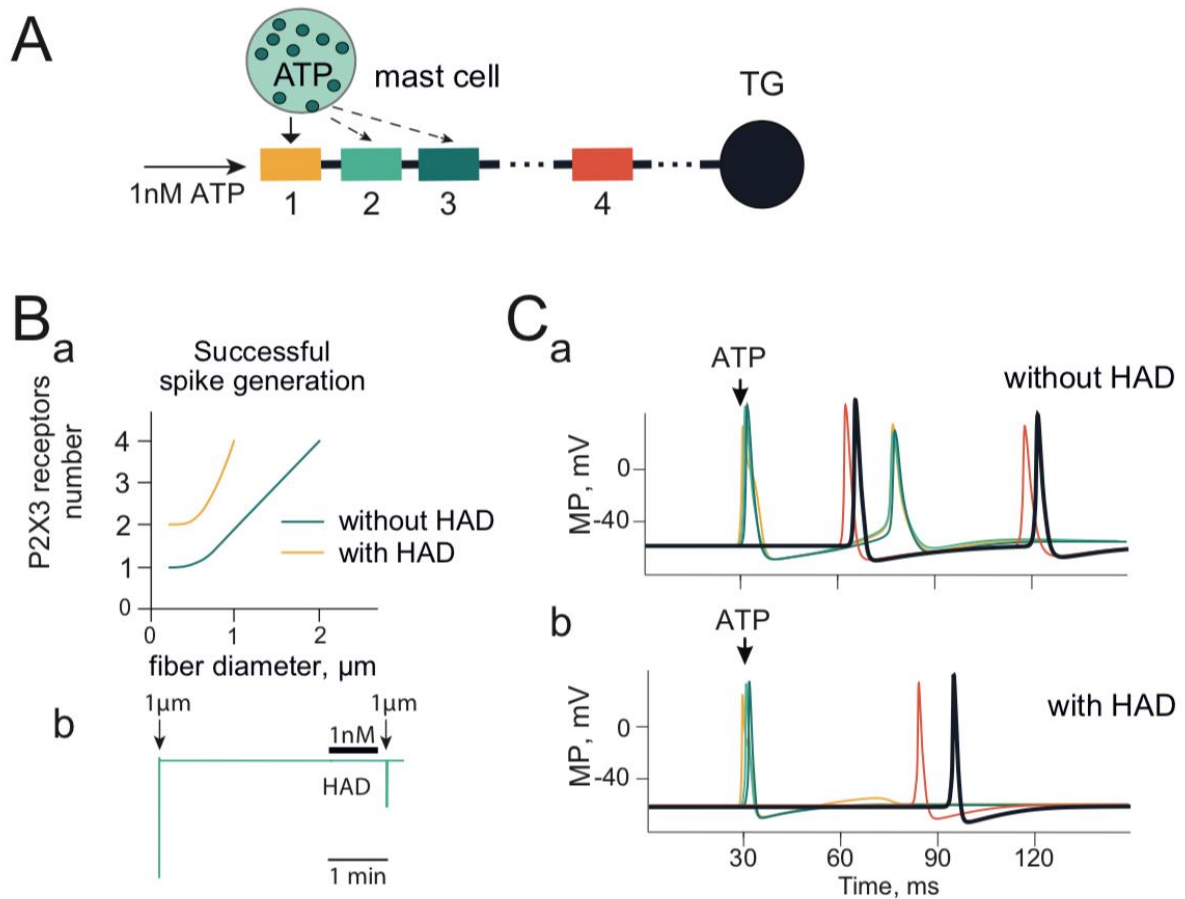

Supplementary Figure 2. Simulation of the role of high-affinity desensitization (HAD) on spiking. (A) Schematic presentation of model with ATP release (1  $\mu$ M), nerve fiber and HAD effect evoked by 1 nM ATP. (Ba) Graph showing the difference between the number of P2X3 receptors required to trigger a spike with HAD and without HAD. Notice the changed slope of this dependence after HAD. (Bb) Influence of HAD (see 1 nM ATP indicated by horizontal black bar) on the amplitude of P2X3 receptor currents (downward green deflections). (Ca) Spiking activity without HAD or (Cb) with HAD.
